# Supplementary material for: The Gene Ontology of eukaryotic cilia and flagella
Source: PubMed Central journal article supplement (PMC5688719; doi:10.1186/s13630-017-0054-8), 2017-11-16

SYSCILIA gold standard

Ross, et al. 2007

2012-12-01 vs. 2017-01-01

2012-12-01 vs. new GO (2017) & old gene annotations (2017)

2012-12-01 vs. old GO (2012) & new gene annotations (2017)

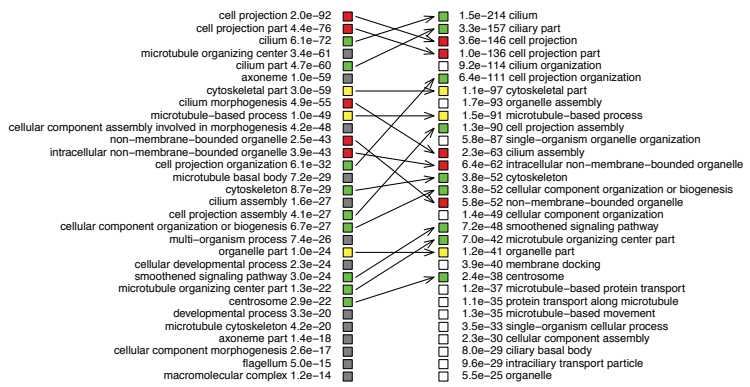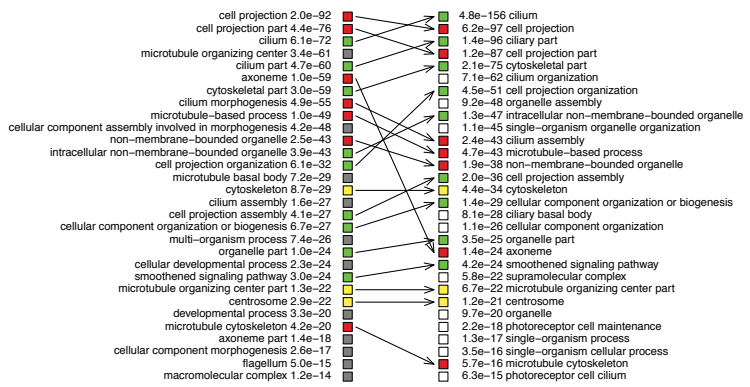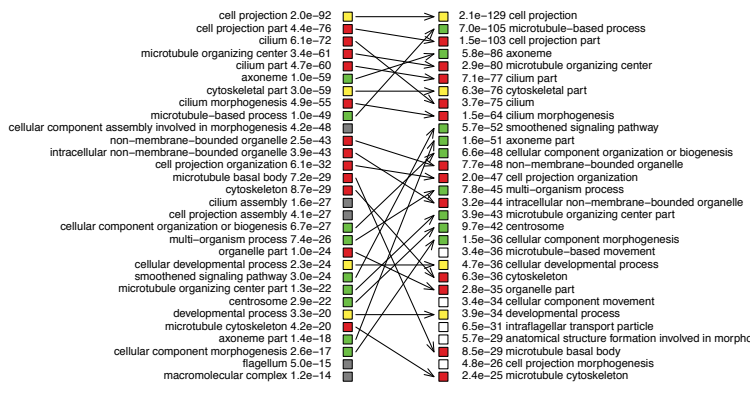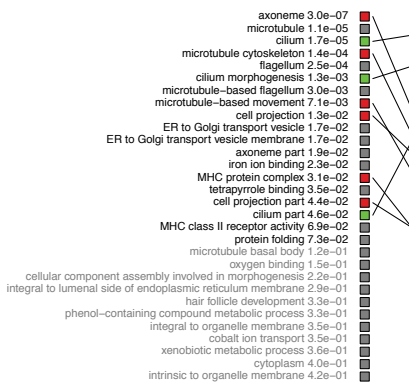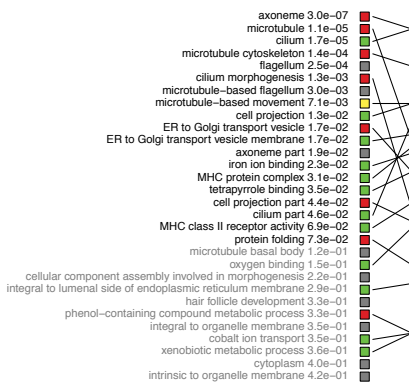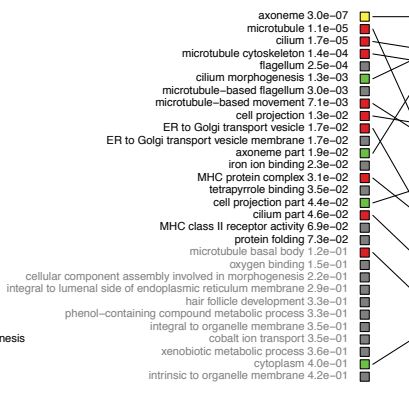

Supplement: 13630_2017_54_MOESM11_ESM.pdf [file 13630_2017_54_MOESM11_ESM.pdf]
